# Supplementary material for: Combined Structural MR and Diffusion Tensor Imaging Classify the Presence of Alzheimer’s Disease With the Same Performance as MR Combined With Amyloid Positron Emission Tomography: A Data Integration Approach
Source: Frontiers journal article supplement (doi:10.3389/fnins.2021.638175), 2022-01-05
Supplement: Image_1.pdf [file Image_1.pdf]

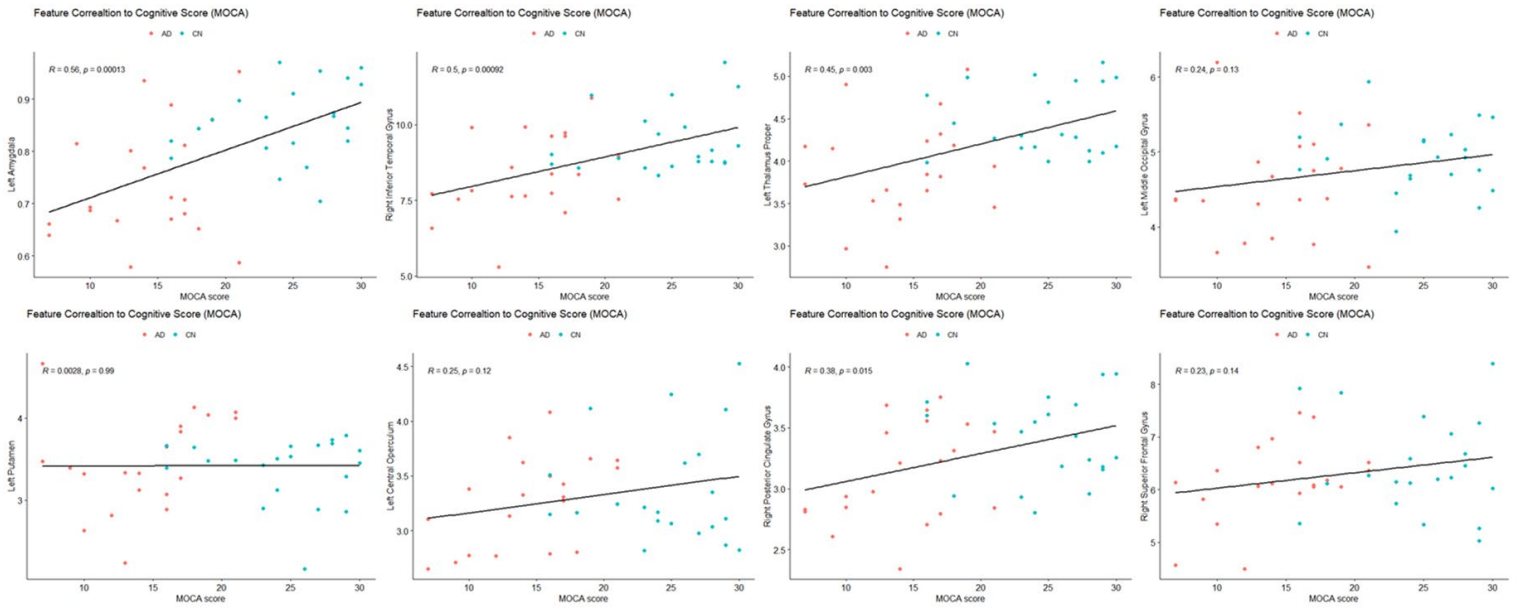

**Figure S2.1.** Correlation between selected features from the MRI-based model and the cognitive MOCA score

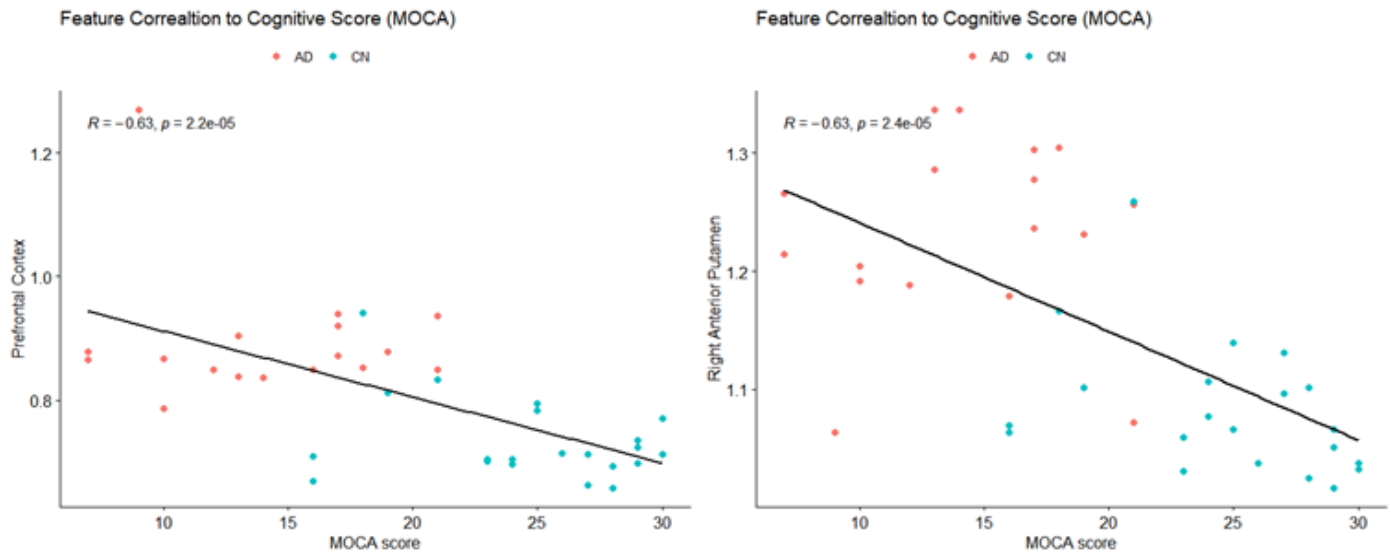

**Figure S2.2** Correlation between selected features from the PiB-PET-based model and the cognitive MOCA score.

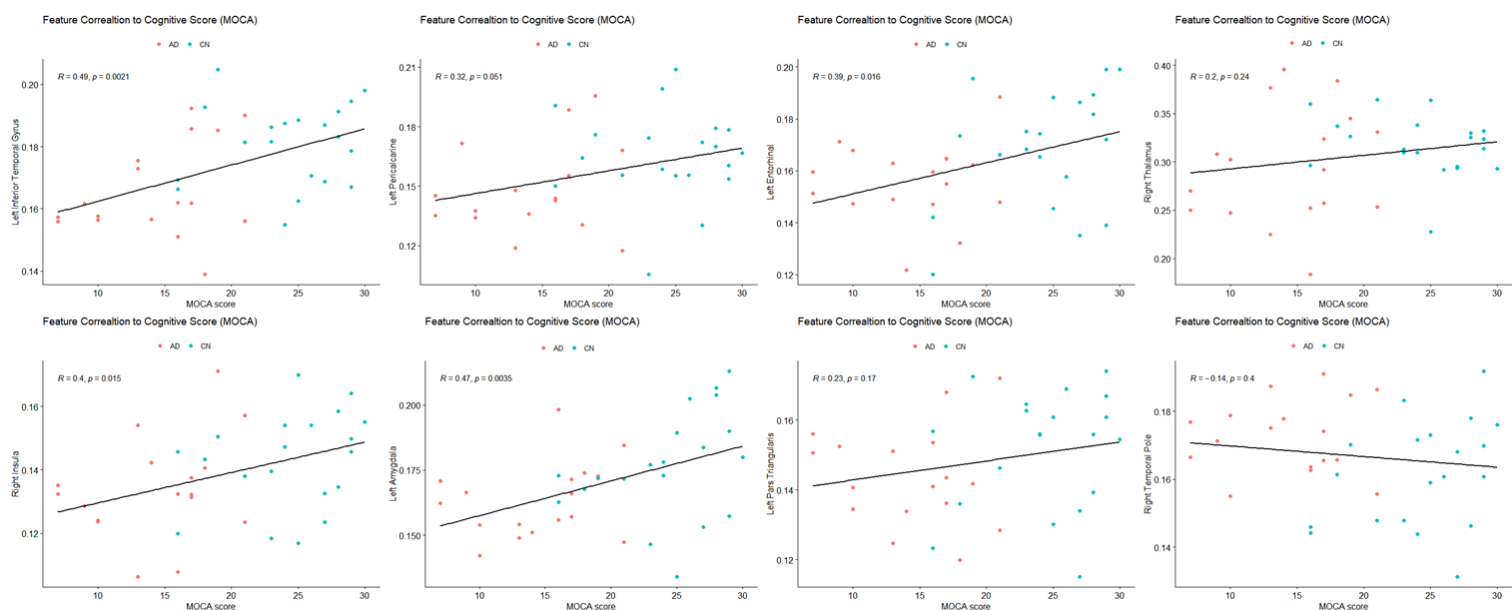

**Figure S2.3** Correlation between selected features from the DTI-based model and the cognitive MOCA score.

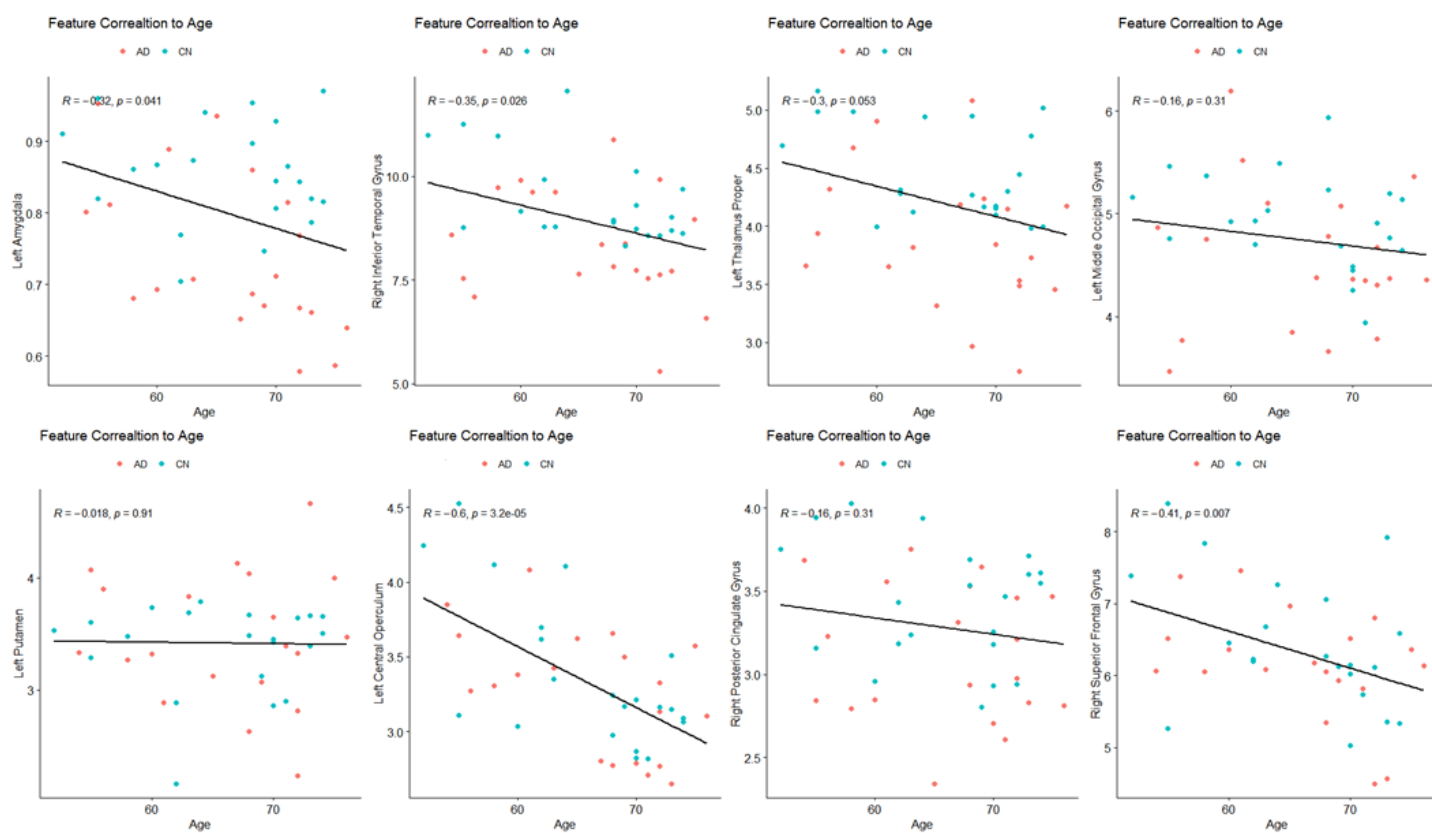

**Figure S2.4** Correlation between selected features from the MRI-based model and the participant's age.

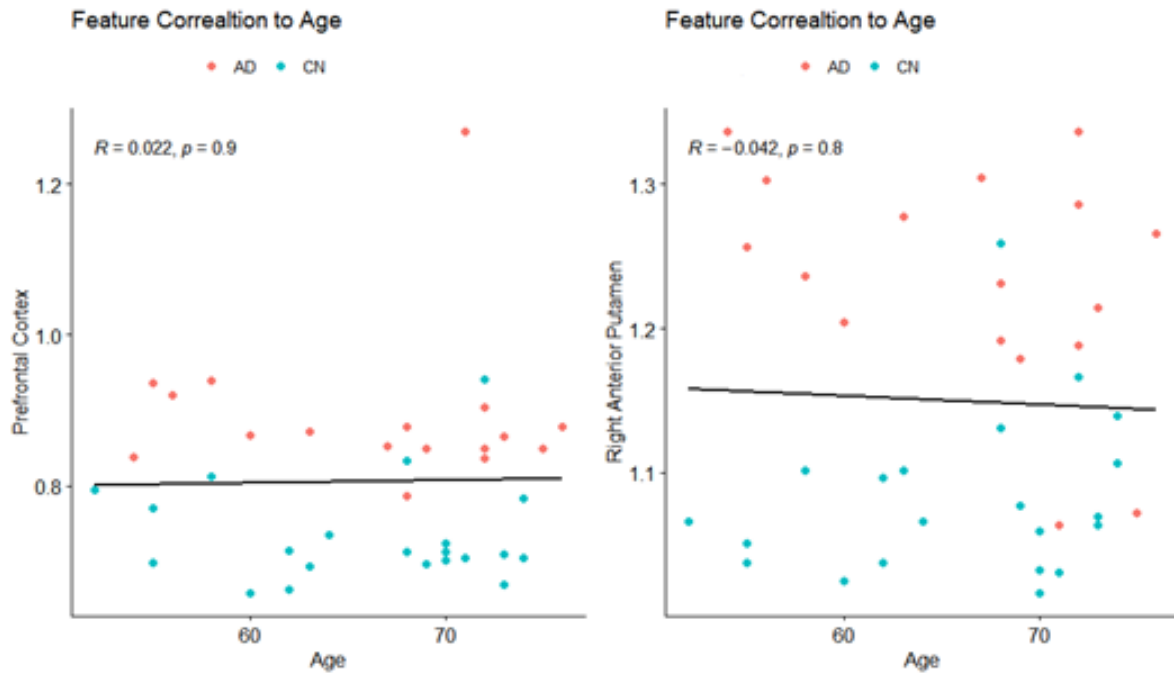

**Figure S2.5** Correlation between selected features from the PiB-PET-based model and the participant's age.

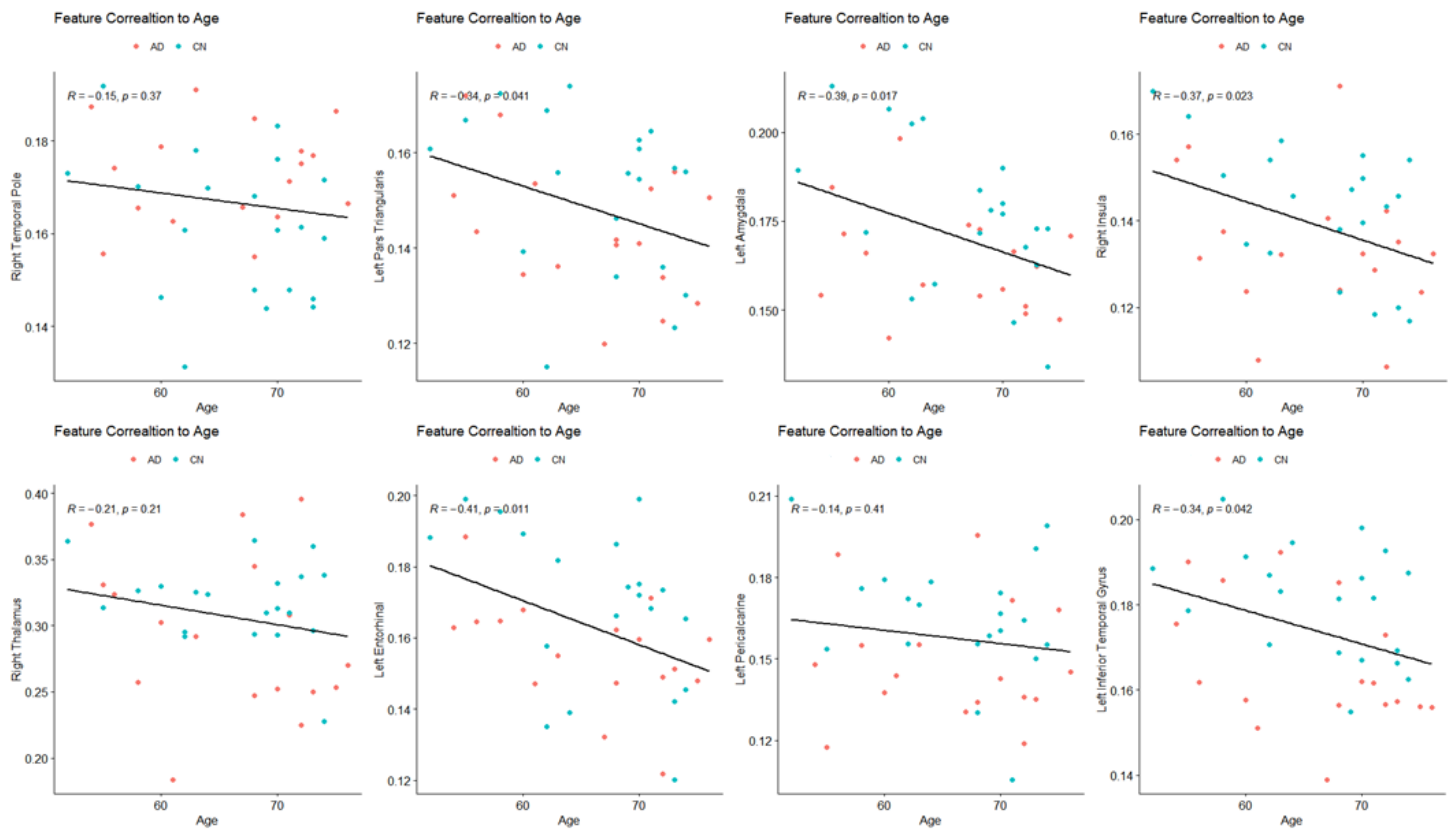

**Figure S2.6** Correlation between selected features from the DTI-based model and the participant's age.
